# Supplementary material for: Effect of High-Intensity Interval Training on Physical Health in Coronary Artery Disease Patients: A Meta-Analysis of Randomized Controlled Trials
Source: MDPI journal article supplement (doi:10.3390/jcdd8110158), 2021-11-18
Supplement: s1 [file s1]

**Table S1.** Systematic literature search.

| Database         | Search Strategy                                                                                                                                                                                                                                                                                                                                                                                                                                                                                                                                                                                                                                                                                                                                                                                                                                                                                                                                                                                                                                                                                                                                                                                              | Results |
|------------------|--------------------------------------------------------------------------------------------------------------------------------------------------------------------------------------------------------------------------------------------------------------------------------------------------------------------------------------------------------------------------------------------------------------------------------------------------------------------------------------------------------------------------------------------------------------------------------------------------------------------------------------------------------------------------------------------------------------------------------------------------------------------------------------------------------------------------------------------------------------------------------------------------------------------------------------------------------------------------------------------------------------------------------------------------------------------------------------------------------------------------------------------------------------------------------------------------------------|---------|
| PubMed           | <p>((((((((((((((((((High-Intensity Interval Training[MeSH Terms]) OR (High Intensity Interval Training[Title/Abstract])) OR (High-Intensity Interval Trainings[Title/Abstract])) OR (Interval Training, High-Intensity[Title/Abstract])) OR (Interval Trainings, High-Intensity[Title/Abstract])) OR (Training, High-Intensity Interval[Title/Abstract])) OR (Trainings, High-Intensity Interval[Title/Abstract])) OR (High-Intensity Intermittent Exercise[Title/Abstract])) OR (Exercise, High-Intensity Intermittent[Title/Abstract])) OR (Exercises, High-Intensity Intermittent[Title/Abstract])) OR (High-Intensity Intermittent Exercises[Title/Abstract])) OR (Sprint Interval Training[Title/Abstract])) OR (Sprint Interval Trainings[Title/Abstract])) OR (high-intensity exercise[Title/Abstract])) OR (intermittent exercise[Title/Abstract])) OR (interval exercise[Title/Abstract])) OR (sprint[Title/Abstract])))) AND (((((coronary artery disease[MeSH Terms]) OR (myocardial infarction[MeSH Terms])) OR (Percutaneous Coronary Intervention[MeSH Terms])) OR (ischaemic heart disease[Title/Abstract])) OR (Angina Pectoris[MeSH Terms])) OR (Acute Coronary Syndrome[MeSH Terms]))</p> | 232     |
| Web of Science   | <p>Topic: ("High-Intensity Interval Training" OR "High Intensity Interval Training" OR "High-Intensity Intermittent Exercises" OR "Aerobic interval training" OR "Sprint Interval Training" OR "Sprint Interval Trainings" OR "high-intensity exercise" OR "intermittent exercise" OR "interval exercise" OR sprint) AND Topic: ("coronary artery disease" OR "myocardial infarction" OR "Percutaneous Coronary Intervention" OR "ischaemic heart disease" OR "Angina Pectoris" OR "Acute Coronary Syndrome" OR "percutaneous intervention")</p>                                                                                                                                                                                                                                                                                                                                                                                                                                                                                                                                                                                                                                                             | 671     |
| Cochrane Library | <p>#1 MeSH descriptor: [High-Intensity Interval Training] explode all trees 436<br/> #2 MeSH descriptor: [Coronary Disease] explode all trees 13847<br/> #3 MeSH descriptor: [Myocardial Infarction] explode all trees 11163<br/> #4 MeSH descriptor: [Percutaneous Coronary Intervention] explode all trees 5573<br/> #5 MeSH descriptor: [Angina Pectoris] explode all trees 4576<br/> #6 MeSH descriptor: [Acute Coronary Syndrome] explode all trees 2032<br/> #7 (High Intensity Interval Training):ti,ab,kw OR (Interval Training, High-Intensity):ti,ab,kw OR (High-Intensity Intermittent Exercise):ti,ab,kw OR (intermittent exercise):ti,ab,kw OR</p>                                                                                                                                                                                                                                                                                                                                                                                                                                                                                                                                              | 479     |

|              |                                                                                                                                                                                                                                                                                                                                                                                                                                                                                                |             |
|--------------|------------------------------------------------------------------------------------------------------------------------------------------------------------------------------------------------------------------------------------------------------------------------------------------------------------------------------------------------------------------------------------------------------------------------------------------------------------------------------------------------|-------------|
|              | (interval exercise):ti,ab,kw (Word variations have been searched) 12801<br>#8 ("ischaemic heart disease"):ti,ab,kw (Word variations have been searched) 6387<br>#9 #1 or #7 12801<br>#10 #2 or #3 or #4 or #6 or #8 30529<br>#11 #9 and #10 479                                                                                                                                                                                                                                                |             |
| SPORTDiscus  | AB ( High-Intensity Interval Training OR High Intensity Interval Training OR High-Intensity Intermittent Exercises OR Aerobic interval training OR Sprint Interval Training OR Sprint Interval Trainings OR high-intensity exercise OR intermittent exercise OR interval exercise )<br>AND AB ( coronary artery disease OR myocardial infarction OR Percutaneous Coronary Intervention OR ischaemic heart disease OR Angina Pectoris OR Acute Coronary Syndrome OR percutaneous intervention ) | 69          |
| CNKI         | TKA = 'high-intensity interval training' + 'high-intensity interval aerobic training' + 'interval training' + 'sprint interval training'+ 'aerobic interval training' AND TKA = 'coronary artery disease' + 'myocardial infarction' + 'percutaneous coronary intervention'+ 'ischemic heart disease' + 'angina pectoris' + 'acute coronary syndrome'                                                                                                                                           | 95          |
| <b>Total</b> |                                                                                                                                                                                                                                                                                                                                                                                                                                                                                                | <b>1546</b> |

**Table S2.** Intervention characteristics

| Study                                               | Mode, Duration, Frequency          | Isocaloric | HIIT Program                                                                                                                                                                                                                                           | MICT Program                                                                                                                                                                                                          |
|-----------------------------------------------------|------------------------------------|------------|--------------------------------------------------------------------------------------------------------------------------------------------------------------------------------------------------------------------------------------------------------|-----------------------------------------------------------------------------------------------------------------------------------------------------------------------------------------------------------------------|
| Abdelhalem 2018                                     | treadmill, 12 weeks, 2d/week       | N          | 40–45 min:<br>①5 min WU<br>②2–5 min at 95% of HR reserve<br>③ 2–5 min 40–60% of HR reserve ④5 min CD                                                                                                                                                   | 40–45 min:<br>①5 min WU<br>②30–35 min exercise at 40–60% of HR reserve<br>③5 min CD                                                                                                                                   |
| Amundsen 2008<br>Rognmo 2004                        | treadmill, 10 weeks, 3d/week       | Y          | 33 min:<br>①5 min WU at 50–60% of VO <sub>2</sub> peak (65–75% of HRpeak)<br>②4×4 min intervals at 80–90 % of VO <sub>2</sub> peak (85–95% HRpeak)<br>③3×3 min pauses at 50–60% of VO <sub>2</sub> peak<br>④3 min CD at 50–60% of VO <sub>2</sub> peak | 41 min:<br>41 min exercise at 50–60% of VO <sub>2</sub> peak                                                                                                                                                          |
| Cardozo 2015                                        | treadmill, 16 weeks, 3d/week       | N          | 40 min:<br>①5 min WU<br>②8×2 min intervals at 90% of peak HR<br>③7×2 min pauses at 60% of peak HR<br>④5 min CD                                                                                                                                         | 40 min:<br>①5 min WU<br>②30 min exercise at 70 to 75% of peak HR<br>③5 min CD                                                                                                                                         |
| Choi 2018                                           | treadmill, 9–10 weeks, 1–2d/week   | N          | 48 min:<br>①10 minutes of stretching, 5 min WU at 40%–50% of HRpeak<br>②4×4 min intervals at 85%–100% of HRpeak<br>③4×3 min pauses at 50%–60% of HRpeak<br>④5 min CD at 40%–50% of HRpeak                                                              | 48 min:<br>①10 minutes of stretching, 5 min WU at 40%–50% of HRpeak<br>②28 min exercise at 60%–70% of HRpeak<br>③5 min CD at 40%–50% of HRpeak                                                                        |
| Conraads 2015<br>Pattyn 2017<br>Van De Heyning 2018 | cycle ergometer, 12 weeks, 3d/week | Y          | 38 min:<br>①10 min WU at 50–60% of VO <sub>2</sub> peak (60–70% of HRpeak)<br>②4 ×4 min intervals at 85–90% of VO <sub>2</sub> peak (90–95% of HRpeak)<br>③4×3 min pauses at 50%–70% of VO <sub>2</sub> peak                                           | 47 min:<br>①5 min WU at 50–60% of VO <sub>2</sub> peak (60–70% of HRpeak)<br>②37 min exercise at 60%–70% of VO <sub>2</sub> peak (65–75% of HRpeak)<br>③5 min CD at 50–60% of VO <sub>2</sub> peak (60–70% of HRpeak) |
| Currie 2013A                                        | cycle ergometer, 12 weeks, 2d/week | N          | 49–54 min:<br>①10–15 min WU and CD<br>②10×1 min intervals at 80%–99% of PPO at week 1–4<br>③10×1 min intervals at 105% ± 12% of PPO at week 5– 8<br>④10×1 min intervals at 107% ± 12% of PPO at week 9– 12<br>⑤9×1 min pauses at 10% of PPO            | 40–65 min:<br>①10–15 min WU and CD<br>②30 min exercise at 55–65% of PPO for week 1–4<br>③40 min exercise at 55–65% of PPO for week 5–8<br>④50 min exercise at 55–65% of PPO for week 9–12                             |

Table S2. *Cont.*

| Study                               | Mode, Duration, Frequency          | Isocaloric | HIIT Program                                                                                                                                                                                                                                                                                                                                                                                                                                                                                                                                                                                                                                                                                                     | MICT Program                                                                                                                                                                                                                                                 |
|-------------------------------------|------------------------------------|------------|------------------------------------------------------------------------------------------------------------------------------------------------------------------------------------------------------------------------------------------------------------------------------------------------------------------------------------------------------------------------------------------------------------------------------------------------------------------------------------------------------------------------------------------------------------------------------------------------------------------------------------------------------------------------------------------------------------------|--------------------------------------------------------------------------------------------------------------------------------------------------------------------------------------------------------------------------------------------------------------|
| Currie 2013B                        | cycle ergometer, 12 weeks, 2d/week | N          | 49–54 min:<br>①10–15 min WU and CD<br>②10×1 min intervals at 89% of PPO for week 1–4<br>③10×1 min intervals at 102% of PPO for week 5–8<br>④10×1 min intervals at 110% of PPO for week 9–12<br>⑤9×1 min pauses at 10% of PPO                                                                                                                                                                                                                                                                                                                                                                                                                                                                                     | 40–65 min:<br>①10–15 min WU and CD<br>②30 min exercise at 51–65% of PPO for week 1–4<br>③40 min exercise at 51–65% of PPO for week 5–8<br>④50 min exercise at 51–65% of PPO for week 9–12                                                                    |
| Eser 2020                           | cycle ergometer, 12 weeks, 3d/week | Y          | 36 min:<br>①8 min WU at 0 to VT1<br>②4 ×4 min intervals at VT2<br>③3×3 min pauses at 0 to VT1<br>④3 min CD at 0 to VT1                                                                                                                                                                                                                                                                                                                                                                                                                                                                                                                                                                                           | 38 min:<br>①5 min WU at 50% of VT1<br>②30 min exercise at VT1<br>③3 min CD at 50% of VT1                                                                                                                                                                     |
| Ghardashi-Afousi 2018               | treadmill, 6 weeks, 3d/week        | N          | 50 min:<br>①5 min WU at 0 to 40% of HRpeak<br>②10×2 min intervals at 85–95% of HRpeak<br>③10×2 min pauses at 50% of HRpeak<br>④5 min WU at 40% of HRpeak                                                                                                                                                                                                                                                                                                                                                                                                                                                                                                                                                         | 50 min:<br>①5 min WU at 0 to 40% of HRpeak<br>②40 min running at 70% of HRpeak<br>③5 min WU at 50% of HRpeak                                                                                                                                                 |
| Jaureguizar 2016<br>Jaureguiza 2019 | cycle ergometer, 8 weeks, 3d/week  | N          | 40 min:<br>①12, 10, 7, 5 min WU at 25 watt for week 1, 2, 3, 4–8 week respectively<br>②15×20s intervals at 50% of PPO with 15×40s pauses at 10% of PPO (reached in the first SRT) for week 1<br>③20×20s intervals at 50% of PPO with 20×40s pauses at 10% of PPO (reached in the first SRT) for week 2<br>④25×20s intervals at 50% of PPO with 25×40s pauses at 10% of PPO (reached in the first SRT) for week 3<br>⑤30×20s intervals at 50% of PPO with 30×40s pauses at 10% of PPO (reached in the first SRT) for week 4<br>⑥30×20s intervals at 50% of PPO with 30×40s pauses at 10% of PPO (reached in the second SRT) for week 4<br>⑦13, 10, 8, 5 min WU at 25 watt for week 1, 2, 3, 4–8 week respectively | 40 min:<br>①12, 10, 7, 5 min WU at 25 watt for week 1, 2, 3, 4–8 respectively<br>②15, 20, 25, 30 min exercise at VT1 for week 1–4<br>③30 min exercise at (VT1 + 10%) for week 5–8<br>④13, 10, 8, 5 min WU at 25 watt for week 1, 2, 3, 4–8 week respectively |
| Keteyian 2014                       | treadmill, 10 weeks, 3d/week       | N          | 40 min:<br>①5 min WU<br>②4×4 min intervals at 80–90% of HR reserve<br>③3×5 min pauses at 60–70% of HR reserve ④4 min CD                                                                                                                                                                                                                                                                                                                                                                                                                                                                                                                                                                                          | 40 min:<br>①5 min WU<br>②30 min exercise at 60–80% of HR reserve<br>③5 min CD                                                                                                                                                                                |

Table S2. *Cont.*

| Study         | Mode, Duration, Frequency                                                                          | Isocaloric | HIIT Program                                                                                                                                                                                                                                      | MICT Program                                                                                                                                                                                                                                  |
|---------------|----------------------------------------------------------------------------------------------------|------------|---------------------------------------------------------------------------------------------------------------------------------------------------------------------------------------------------------------------------------------------------|-----------------------------------------------------------------------------------------------------------------------------------------------------------------------------------------------------------------------------------------------|
| Kim 2015      | treadmill, 6 weeks, 3d/week                                                                        | Y          | 45 min:<br>①10 min WU at 50–70% HR reserve<br>②4×4 min intervals at 85–95% HR reserve<br>③3×3 min pauses at 50–70% HR reserve<br>④10 min CD at 50–70% HR reserve                                                                                  | 45 min:<br>①10 min WU<br>②25 min walking at 70–85% HR reserve<br>③10 min CD                                                                                                                                                                   |
| Moholdt 2009  | treadmill, 4 weeks, 5d/week                                                                        | Y          | 38 min:<br>①8 min WU<br>②4×4 min intervals at 90% of HR <sub>peak</sub><br>③3×3 min pauses at 70% of HR <sub>peak</sub> ④5 min CD                                                                                                                 | 46mins:<br>46 min walking at 70% of HR <sub>peak</sub>                                                                                                                                                                                        |
| Moholdt 2012  | treadmill, 12 weeks, 3d/week                                                                       | N          | 38 min:<br>①8 min WU<br>②4×4 min intervals at 85–95% of HR <sub>peak</sub><br>③3×3 min pauses at 70% of HR <sub>peak</sub> ④5 min CD                                                                                                              | 50 min:<br>①10 min WU<br>②35 min walking, jogging, lunges and squats<br>③5 min CD                                                                                                                                                             |
| Prado 2016    | treadmill, 12 weeks, 3d/week                                                                       | Y          | 52 min:<br>①5 min WU<br>②7×3 min intervals at RCP<br>③7×3 min pauses at AT ④5 min CD                                                                                                                                                              | 60 min:<br>①5 min WU<br>②50 min exercise at AT ③5 min CD                                                                                                                                                                                      |
| Reed 2021     | various (treadmill, cycle ergometer, elliptical, dance/movement-based routines), 12 weeks, 2d/week | N          | 38 min:<br>①5 min WU at 60–70% of HR <sub>peak</sub><br>②4×3 min intervals at 85–95% of HR <sub>peak</sub> (RPE 15–18)<br>③7×3 min pauses at 60–70% of HR <sub>peak</sub> (RPE 11–13)<br>④5 min CD at 60–70% of HR <sub>peak</sub>                | 60 min:<br>①10–15 min WU at 60–70% of HR <sub>peak</sub><br>②10–15 min exercise (walking or jogging, cycling, elliptical, rowing) for week 1–3<br>③30 min exercise (walking or jogging, cycling, elliptical, rowing) for week 4–12 ④15 min CD |
| Taylor 2020   | various (treadmill, cycle ergometer, cross-trainer, or rowing ergometer), 4 weeks, 3d/week         | Y          | 25 min:<br>①4×4 intervals at RPE 15–18<br>②3×3 min pauses at RPE 11–13                                                                                                                                                                            | 40 min:<br>40 min exercise at RPE 11–13                                                                                                                                                                                                       |
| Trachsel 2019 | cycle ergometer, 12 weeks, 2–3d/week                                                               | Y          | 38–50 min:<br>①5 min WU at 30% PPO<br>②2–3 sets of 6–10 minutes with repeated bouts of 15–30s at 100% of PPO alternating with 15 to 30s of passive recovery<br>③5-minute active recovery phase at 30% of PPO between sets<br>④5 min CD at 30% PPO | 34 min:<br>①5 min WU at 30% of PPO<br>②24 min exercise at 60% of PPO<br>③5 min CD at 30% of PPO                                                                                                                                               |

Table S2. *Cont.*

| Study          | Mode, Duration, Frequency                                              | Isocaloric | HIIT Program                                                                                                                                                    | MICT Program                                                                                 |
|----------------|------------------------------------------------------------------------|------------|-----------------------------------------------------------------------------------------------------------------------------------------------------------------|----------------------------------------------------------------------------------------------|
| Warburton 2005 | various (treadmill, stair climber, cycle ergometer), 16 weeks, 2d/week | Y          | 50 min:<br>①10 min WU<br>②8×2 min intervals at 85–95% of HR/VO <sub>2</sub> reserve<br>③7×2 min intervals at 35–45% of HR/VO <sub>2</sub> reserve<br>④10 min CD | 50 min:<br>①10 min WU<br>②30 min exercise at 65% of HR/VO <sub>2</sub> reserve<br>③10 min CD |
| Ye 2020        | cycle ergometer, 12 weeks, 3d/week                                     | N          | 45 min:<br>①5 min WU<br>②10×3 min intervals at 80% of PPO<br>③10×1 min of passive recovery                                                                      | 45 min:<br>①5 min WU<br>②40 min cycling at 60% of PPO                                        |
| Gao 2015       | cycle ergometer, 12 weeks, 3d/week                                     | N          | 50 min:<br>①5 min WU<br>②10×3 min intervals at 80% of PPO<br>③10×1 min of passive recovery<br>④5 min CD                                                         | 50 min:<br>①5 min WU<br>②40 min cycling at 60% of PPO<br>③5 min CD                           |

**Abbreviations:** WU, warm-up; CD, cool-down; PPO, peak power output; HR, heart rate; HR<sub>peak</sub>, peak heart rate; VO<sub>2peak</sub>, peak oxygen uptake; RPE, rating of perceived exertion; VT1, first ventilatory threshold; VT2, second ventilatory threshold; AT, anaerobic threshold; SRT, steep ramp test; RCP, respiratory compensation point ; Y, yes; N, no.

**Table S3.** Subgroup analyses of effects of HIIT versus MICT on VO<sub>2peak</sub>.

| Outcome             | Subgroup                  | Potential Factors | Included Studies | Sample Size | 95% Confidence Intervals | Heterogeneity          | p-Value     |
|---------------------|---------------------------|-------------------|------------------|-------------|--------------------------|------------------------|-------------|
| VO <sub>2peak</sub> | Intervention duration     | <12 weeks         | 7                | 371         | 1.68(0.44,2.92)          | $I^2=0\%$<br>$p=0.68$  | $p=0.008$   |
|                     |                           | ≥12 weeks         | 9                | 584         | 1.73(0.75,2.71)          | $I^2=33\%$<br>$p=0.15$ | $p=0.0005$  |
|                     | Duration of HIIT interval | ≤1min             | 4                | 186         | 0.31(-1.25,1.87)         | $I^2=0\%$<br>$p=0.61$  | $p=0.70$    |
|                     |                           | 1–3min            | 4                | 245         | 2.42(1.92,2.92)          | $I^2=0\%$<br>$p=0.41$  | $p<0.00001$ |
|                     |                           | ≥4min             | 8                | 524         | 1.62(0.49,2.75)          | $I^2=0\%$<br>$p=0.72$  | $p=0.005$   |
|                     | Work/ rest ratio          | ≤1                | 6                | 268         | 0.84(0.55,2.22)          | $I^2=10\%$<br>$p=0.35$ | $p=0.24$    |
|                     |                           | >1                | 10               | 687         | 2.30(1.83,2.77)          | $I^2=0\%$<br>$p=0.68$  | $p<0.00001$ |
|                     | Energy consumption        | isocaloric        | 7                | 439         | 0.75(-0.42,1.91)         | $I^2=0\%$<br>$p=0.68$  | $p=0.21$    |
|                     |                           | Not isocaloric    | 9                | 516         | 2.36(1.88,2.83)          | $I^2=0\%$<br>$p=0.62$  | $p<0.00001$ |
|                     | Exercise mode             | Treadmill         | 7                | 330         | 2.13(0.83,3.44)          | $I^2=0\%$<br>$p=0.51$  | $p=0.001$   |
|                     |                           | cycle ergometer   | 8                | 539         | 1.53(0.50,2.57)          | $I^2=37\%$<br>$p=0.13$ | $p=0.004$   |
|                     |                           | Others            | 1                | 86          | 1.70(-1.53,4.93)         | unclear                | $p=0.3$     |

### VE/VCO<sub>2</sub> Slope

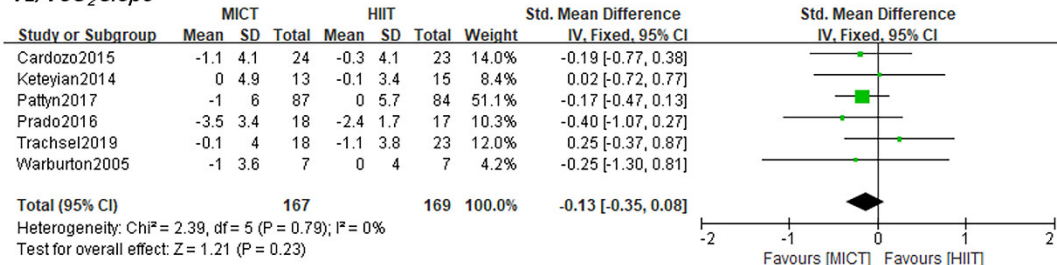

### OUES

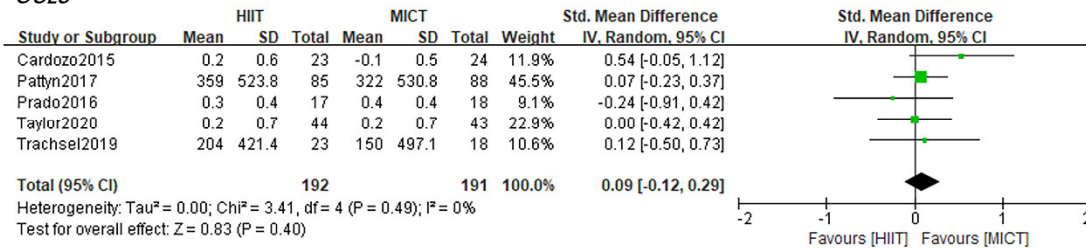

### Peak O<sub>2</sub> pulse

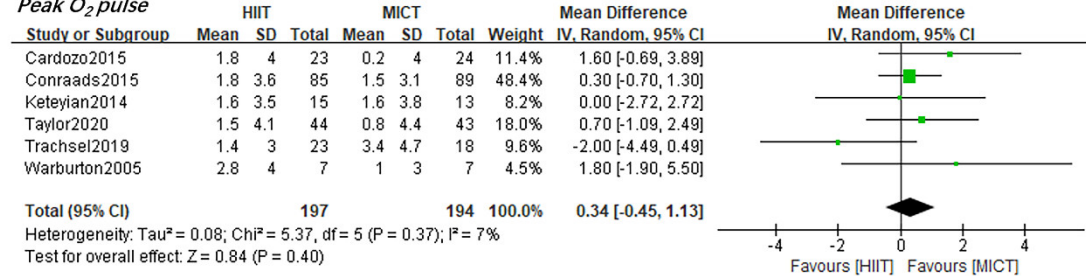

**Figure S1.** Changes in VE/VCO<sub>2</sub> slope, OUES and peak O<sub>2</sub> pulse between HIIT and MICT. The green and black symbol means the mean difference of each studies and total mean difference.



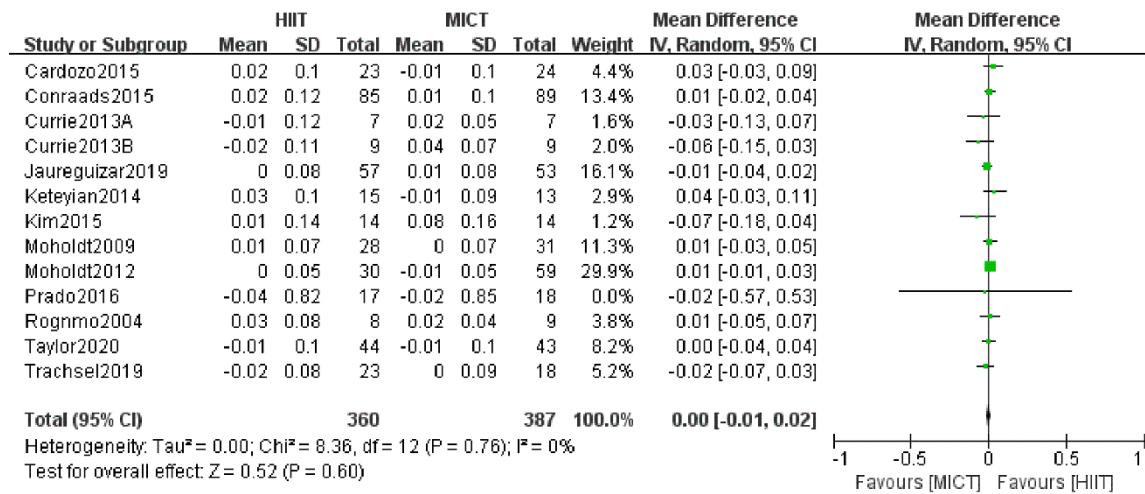

**Figure S2.** Changes in respiratory exchange ratio between HIIT and MICT. The green and black symbol means the mean difference of each studies and total mean difference.

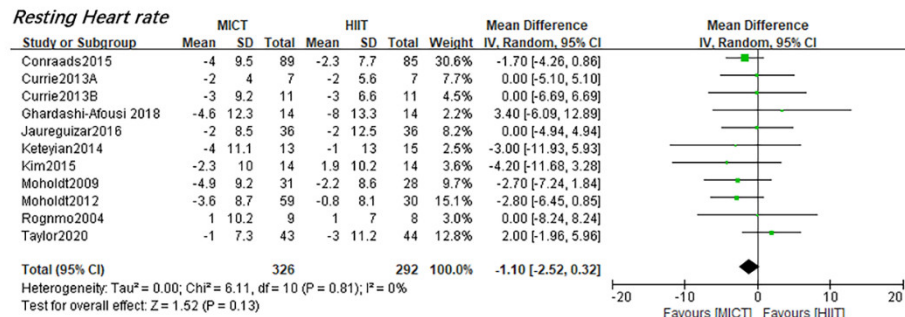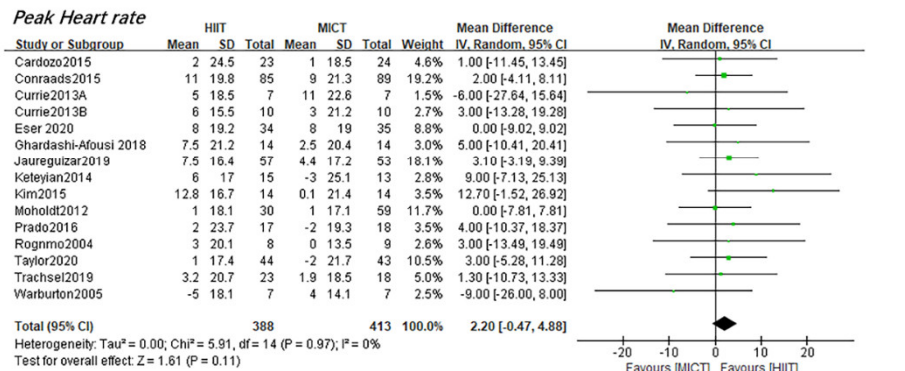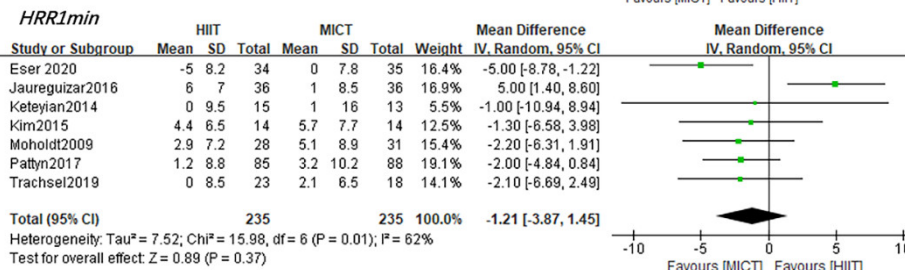

**Figure S3.** Changes in  $HR_{peak}$ ,  $HR_{rest}$  and HRR 1min between HIIT and MICT. The green and black symbol means the mean difference of each studies and total mean difference.

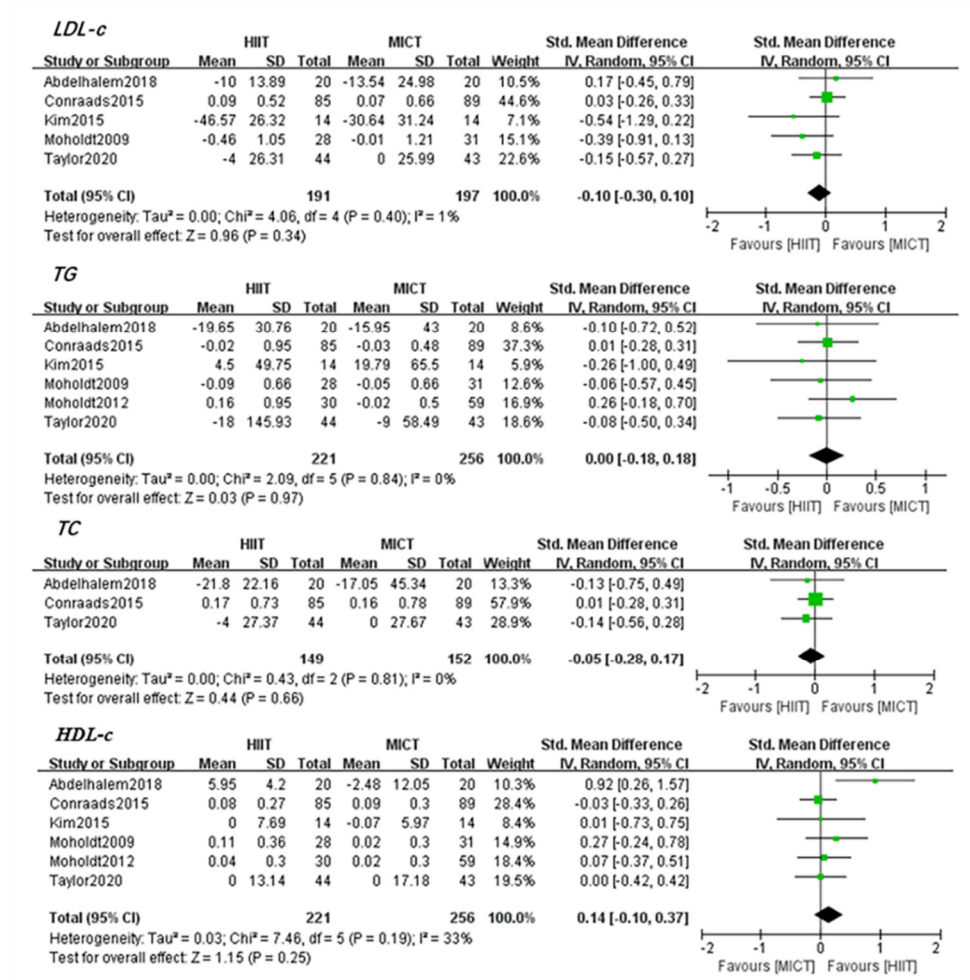

**Figure S4.** Changes in resting blood lipid profiles between HIIT and MICT. The green and black symbol means the mean difference of each studies and total mean difference.

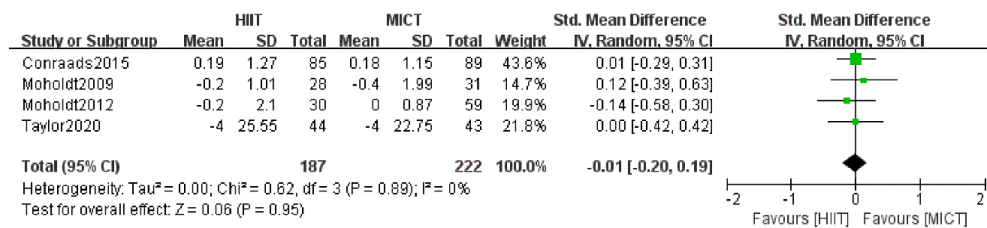

**Figure S5.** Changes in fasting blood glucose between HIIT and MICT. The green and black symbol means the mean difference of each studies and total mean difference.

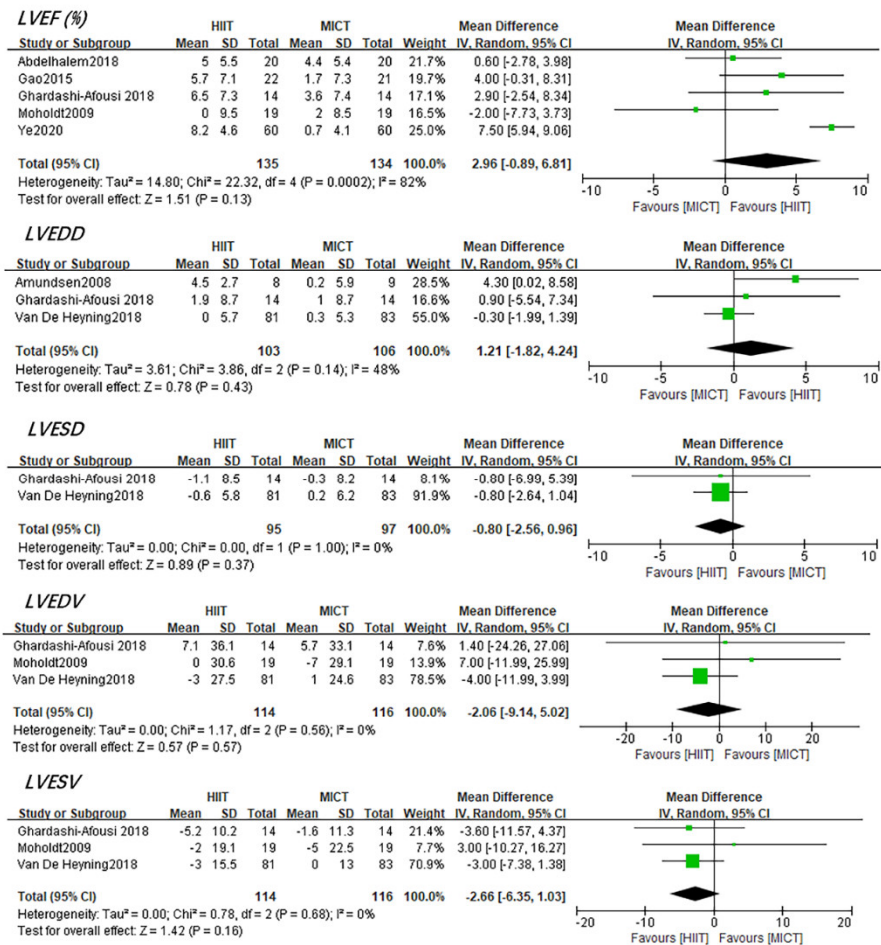

**Figure S6.** Changes in left ventricular function and remodeling between HIIT and MICT. The green and black symbol means the mean difference of each studies and total mean difference.

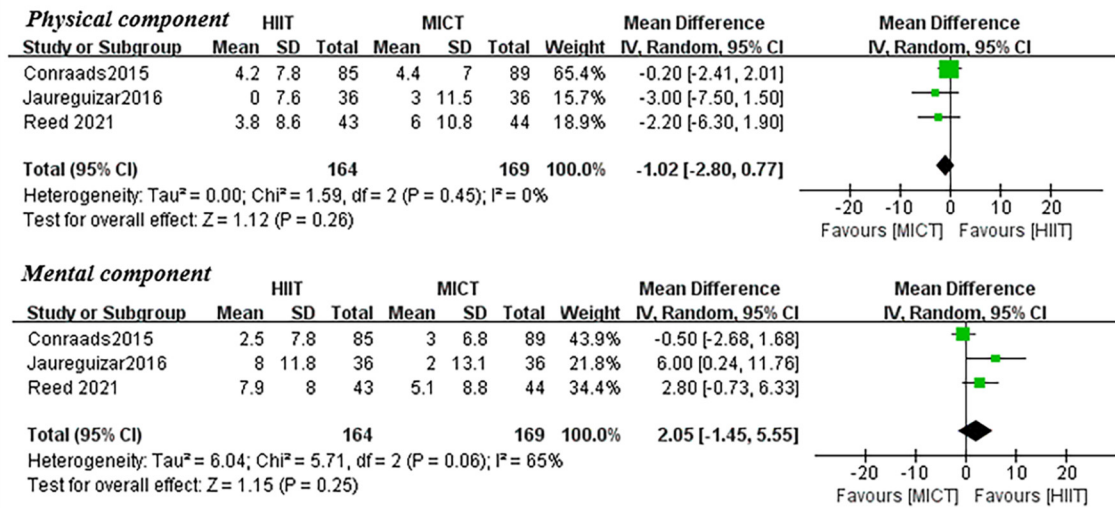

**Figure S7.** Changes in QoL assessed by SF-36 between HIIT and MICT. The green and black symbol means the mean difference of each studies and total mean difference.

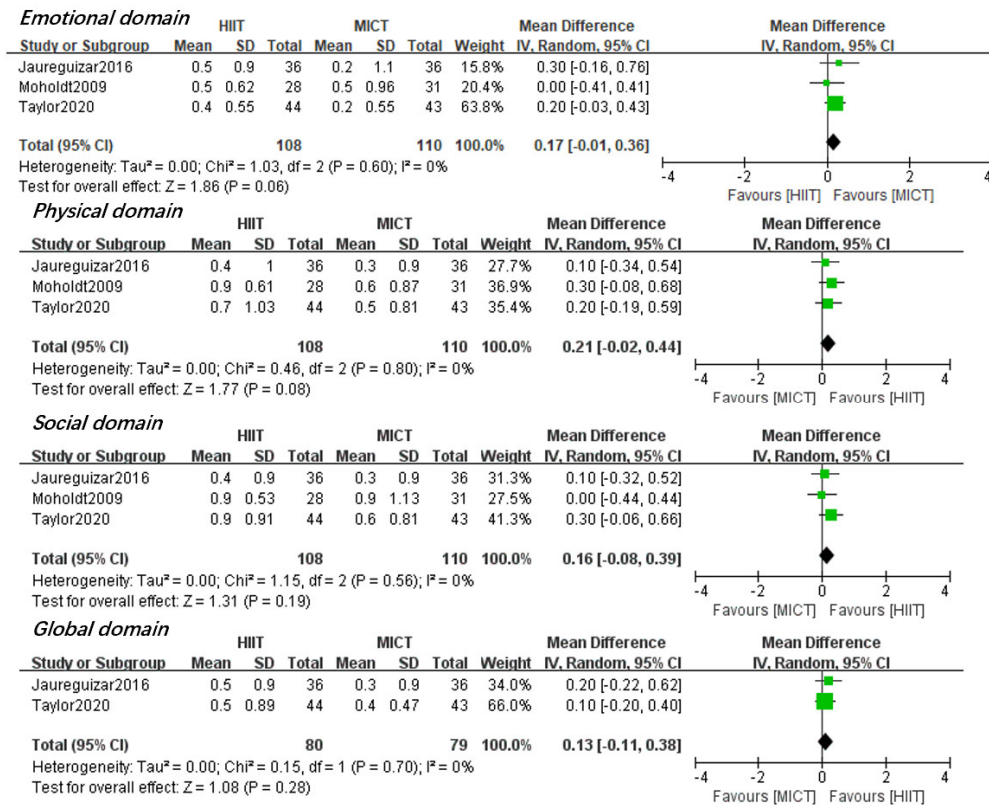

**Figure S8.** Changes in QoL assessed by MacNew between HIIT and MICT. The green and black symbol means the mean difference of each studies and total mean difference.
